# Supplementary material for: Risk of Amyotrophic Lateral Sclerosis and Exposure to Particulate Matter from Vehicular Traffic: A Case-Control Study
Source: MDPI journal article supplement (doi:10.3390/ijerph18030973), 2021-01-22
Supplement: s1 [file s1]

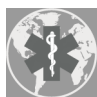

## SUPPLEMENTAL MATERIAL

**Table S1.** Characteristics of the excluded study population. Number (%) of subjects reported.

| Characteristics                                     | Cases      | Controls    | All subjects |
|-----------------------------------------------------|------------|-------------|--------------|
| All subjects                                        | 7 (100)    | 6 (100)     | 13 (100)     |
| Sex                                                 |            |             |              |
| Men                                                 | 4 (57.1)   | 5 (83.3)    | 9 (69.2)     |
| Women                                               | 3 (42.9)   | 1 (16.7)    | 4 (30.8)     |
| Age <sup>1</sup>                                    | 54.5 (3.7) | 51.7 (17.0) | 53.2 (14.7)  |
| <65 years                                           | 5 (71.4)   | 5 (83.3)    | 10 (76.9)    |
| ≥65 years                                           | 2 (28.6)   | 1 (16.7)    | 3 (23.1)     |
| Annual median PM <sub>10</sub> levels <sup>1</sup>  | -          | -           | -            |
| Annual maximum PM <sub>10</sub> levels <sup>1</sup> | -          | -           | -            |

<sup>1</sup> Mean (standard deviation).

**Table S2.** Risk of amyotrophic lateral sclerosis according to particulate matter (PM<sub>10</sub>) exposure using fixed cutpoints with further adjustment for agricultural land use or inorganic selenium

| Exposure                               | Cases/<br>Controls | OR <sup>a</sup> | (95% CI)       | Cases/<br>Controls | OR <sup>b</sup> | (95% CI)       |
|----------------------------------------|--------------------|-----------------|----------------|--------------------|-----------------|----------------|
| Annual median PM <sub>10</sub> levels  |                    |                 |                |                    |                 |                |
| <5 µg/m <sup>3</sup>                   | 30/45              | 1.00            | -              | 18/35              | 1.00            | -              |
| 5-10 µg/m <sup>3</sup>                 | 17/28              | 0.84            | (0.36 - 1.94)  | 13/19              | 1.07            | (0.39 - 2.93)  |
| 10-20 µg/m <sup>3</sup>                | 4/6                | 0.91            | (0.23 - 3.63)  | 3/6                | 0.82            | (0.17 - 4.02)  |
| ≥20 µg/m <sup>3</sup>                  | 1/1                | 0.83            | (0.05 - 14.55) | 0/0                | -               | -              |
| Annual maximum PM <sub>10</sub> levels |                    |                 |                |                    |                 |                |
| <10 µg/m <sup>3</sup>                  | 4/8                | 1.00            | -              | 3/6                | 1.00            | -              |
| 10-20 µg/m <sup>3</sup>                | 6/4                | 4.39            | (0.71 - 27.14) | 4/2                | 7.59            | (0.73 - 79.24) |
| 20-50 µg/m <sup>3</sup>                | 28/40              | 1.29            | (0.32 - 5.27)  | 17/32              | 1.24            | (0.24 - 6.33)  |
| ≥50 µg/m <sup>3</sup>                  | 14/28              | 0.97            | (0.22 - 4.35)  | 10/20              | 1.17            | (0.21 - 6.57)  |

<sup>a</sup> Model adjusted for sex, age, and agricultural land use <sup>b</sup> Model adjusted for sex, age and inorganic selenium levels in cerebrospinal fluids. OR, odds ratio; CI, confidence interval.

**Table S3.** Risk of amyotrophic lateral sclerosis according to particulate matter (PM<sub>10</sub>) exposure using fixed cutpoints in subjects with stable residence within five years of diagnosis with further adjustment for agricultural land use or inorganic selenium.

| Exposure                               | Cases/<br>Controls | OR <sup>a</sup> | (95% CI)       | Cases/<br>Controls | OR <sup>b</sup> | (95% CI)        |
|----------------------------------------|--------------------|-----------------|----------------|--------------------|-----------------|-----------------|
| Annual median PM <sub>10</sub> levels  |                    |                 |                |                    |                 |                 |
| <5 µg/m <sup>3</sup>                   | 22/45              | 1.00            | -              | 12/35              | 1.00            | -               |
| 5-10 µg/m <sup>3</sup>                 | 16/28              | 1.01            | (0.42 - 2.46)  | 12/19              | 1.21            | (0.41 - 3.63)   |
| 10-20 µg/m <sup>3</sup>                | 4/6                | 1.34            | (0.33 - 5.45)  | 3/6                | 1.32            | (0.26 - 6.75)   |
| ≥20 µg/m <sup>3</sup>                  | 1/1                | 1.14            | (0.06 - 20.10) | 0/0                | -               | -               |
| Annual maximum PM <sub>10</sub> levels |                    |                 |                |                    |                 |                 |
| <10 µg/m <sup>3</sup>                  | 3/8                | 1.00            | -              | 2/6                | 1.00            | -               |
| 10-20 µg/m <sup>3</sup>                | 2/4                | 2.19            | (0.23 - 20.97) | 1/2                | 4.78            | (0.22 - 105.57) |
| 20-50 µg/m <sup>3</sup>                | 24/40              | 1.61            | (0.34 - 7.73)  | 14/32              | 1.39            | (0.21 - 9.24)   |
| ≥50 µg/m <sup>3</sup>                  | 14/28              | 1.50            | (0.28 - 7.94)  | 10/20              | 1.67            | (0.23 - 11.89)  |

<sup>a</sup> Model adjusted for sex, age, and agricultural land use <sup>b</sup> Model adjusted for sex, age and inorganic selenium levels in cerebrospinal fluids. OR, odds ratio; CI, confidence interval.

**Table S4.** Risk of amyotrophic lateral sclerosis according to particulate matter (PM<sub>10</sub>) exposure using tertile distribution with further adjustment for agricultural land use or inorganic selenium.

| Exposure categories                    | Median value (µg/m <sup>3</sup> ) | Cases/Controls | OR <sup>a</sup> | (95% CI)      | Median value (µg/m <sup>3</sup> ) | Cases/Controls | OR <sup>b</sup> | (95% CI)      |
|----------------------------------------|-----------------------------------|----------------|-----------------|---------------|-----------------------------------|----------------|-----------------|---------------|
| Annual median PM <sub>10</sub> levels  |                                   |                |                 |               |                                   |                |                 |               |
| T1 <3.0 µg/m <sup>3</sup>              | 1.4                               | 19/26          | 1.00            | -             | 1.4                               | 12/20          | 1.00            | -             |
| T2 ≥3.0-<6.6 µg/m <sup>3</sup>         | 4.2                               | 17/27          | 0.63            | (0.25 - 1.62) | 4.3                               | 11/22          | 0.57            | (0.19 - 1.75) |
| T3 ≥6.6 µg/m <sup>3</sup>              | 8.4                               | 16/27          | 0.67            | (0.26 - 1.73) | 8.4                               | 11/18          | 0.79            | (0.25 - 2.50) |
| Annual maximum PM <sub>10</sub> levels |                                   |                |                 |               |                                   |                |                 |               |
| T1 <30.0 µg/m <sup>3</sup>             | 20.5                              | 22/26          | 1.00            | -             | 20.2                              | 14/17          | 1.00            | -             |
| T2 ≥30.0-<50.4 µg/m <sup>3</sup>       | 38.3                              | 16/27          | 0.71            | (0.29 - 1.70) | 38.2                              | 10/24          | 0.40            | (0.13 - 1.24) |
| T3 ≥50.4 µg/m <sup>3</sup>             | 59.5                              | 14/27          | 0.61            | (0.24 - 1.54) | 58.8                              | 10/19          | 0.52            | (0.16 - 1.64) |

<sup>a</sup> Model adjusted for sex, age, and agricultural land use <sup>b</sup> Model adjusted for sex, age and inorganic selenium levels in cerebrospinal fluids. OR, odds ratio; CI, confidence interval.

**Table S5.** Risk of amyotrophic lateral sclerosis according to particulate matter (PM<sub>10</sub>) exposure using tertile distribution in subjects keeping a stable residence in the five years before diagnosis with further adjustment for agricultural land use or inorganic selenium.

| Exposure categories                    | Median value (µg/m <sup>3</sup> ) | Cases/Controls | OR <sup>a</sup> | (95% CI)      | Median value (µg/m <sup>3</sup> ) | Cases/Controls | OR <sup>b</sup> | (95% CI)      |
|----------------------------------------|-----------------------------------|----------------|-----------------|---------------|-----------------------------------|----------------|-----------------|---------------|
| Annual median PM <sub>10</sub> levels  |                                   |                |                 |               |                                   |                |                 |               |
| T1 <3.0 µg/m <sup>3</sup>              | 1.4                               | 12/26          | 1.00            | -             | 1.4                               | 7/20           | 1.00            | -             |
| T2 ≥3.0-<6.6 µg/m <sup>3</sup>         | 4.2                               | 15/27          | 0.81            | (0.28 - 2.33) | 4.3                               | 9/22           | 0.63            | (0.17 - 2.33) |
| T3 ≥6.6 µg/m <sup>3</sup>              | 8.4                               | 16/27          | 1.04            | (0.37 - 2.90) | 8.4                               | 11/18          | 1.16            | (0.33 - 4.13) |
| Annual maximum PM <sub>10</sub> levels |                                   |                |                 |               |                                   |                |                 |               |
| T1 <30.0 µg/m <sup>3</sup>             | 22.2                              | 14/26          | 1.00            | -             | 20.6                              | 8/17           | 1.00            | -             |
| T2 ≥30.0-<50.4 µg/m <sup>3</sup>       | 38.2                              | 15/27          | 1.06            | (0.41 - 2.79) | 38.1                              | 9/24           | 0.55            | (0.15 - 1.97) |
| T3 ≥50.4 µg/m <sup>3</sup>             | 59.5                              | 14/27          | 1.02            | (0.38 - 2.78) | 58.9                              | 10/19          | 0.85            | (0.24 - 2.96) |

<sup>a</sup> Model adjusted for sex, age, and agricultural land use <sup>b</sup> Model adjusted for sex, age and inorganic selenium levels in cerebrospinal fluids. OR, odds ratio; CI, confidence interval.

**Table S6.** Risk of amyotrophic lateral sclerosis according to particulate matter (PM<sub>10</sub>) exposure comparing the highest and the three lowest quartiles lumped together with further adjustment for agricultural land use or inorganic selenium.

| Exposure                               | Cases/Controls | OR <sup>a</sup> | (95% CI)      | Cases/Controls | OR <sup>b</sup> | (95% CI)      |
|----------------------------------------|----------------|-----------------|---------------|----------------|-----------------|---------------|
| Annual median PM <sub>10</sub> levels  |                |                 |               |                |                 |               |
| Q1-Q3 <7.3 µg/m <sup>3</sup>           | 38/60          | 1.00            | -             | 24/46          | 1.00            | -             |
| Q4 ≥7.3 µg/m <sup>3</sup>              | 14/20          | 1.11            | (0.49 - 2.55) | 10/14          | 1.44            | (0.42 - 3.99) |
| Annual maximum PM <sub>10</sub> levels |                |                 |               |                |                 |               |
| Q1-Q3 <55.0 µg/m <sup>3</sup>          | 45/60          | 1.00            | -             | 29/46          | 1.00            | -             |
| Q4 ≥55.0 µg/m <sup>3</sup>             | 7/20           | 0.43            | (0.16 - 1.13) | 4/14           | 0.49            | (0.15 - 1.58) |

<sup>a</sup> Model adjusted for sex, age, and agricultural land use <sup>b</sup> Model adjusted for sex, age and inorganic selenium levels in cerebrospinal fluids. OR, odds ratio; CI, confidence interval.

**Table S7.** Risk of amyotrophic lateral sclerosis according to particulate matter (PM<sub>10</sub>) exposure comparing the highest and the three lowest quartiles lumped together in subjects keeping a stable residence in the five years before diagnosis with further adjustment for agricultural land use or inorganic selenium.

| Exposure                               | Cases/<br>Controls | OR <sup>a</sup> | (95% CI)      | Cases/<br>Controls | OR <sup>b</sup> | (95% CI)      |
|----------------------------------------|--------------------|-----------------|---------------|--------------------|-----------------|---------------|
| Annual median PM <sub>10</sub> levels  |                    |                 |               |                    |                 |               |
| Q1-Q3 <7.3 µg/m <sup>3</sup>           | 29/60              | 1.00            | -             | 17/46              | 1.00            | -             |
| Q4 ≥7.3 µg/m <sup>3</sup>              | 14/20              | 1.51            | (0.64 - 3.55) | 10/14              | 2.06            | (0.71 - 6.01) |
| Annual maximum PM <sub>10</sub> levels |                    |                 |               |                    |                 |               |
| Q1-Q3 <55.0 µg/m <sup>3</sup>          | 36/60              | 1.00            | -             | 22/46              | 1.00            | -             |
| Q4 ≥55.0 µg/m <sup>3</sup>             | 7/20               | 0.54            | (0.20 - 1.46) | 5/14               | 0.65            | (0.19 - 2.17) |

<sup>a</sup> Model adjusted for sex, age, and agricultural land use <sup>b</sup> Model adjusted for sex, age and inorganic selenium levels in cerebrospinal fluids. OR, odds ratio; CI, confidence interval.

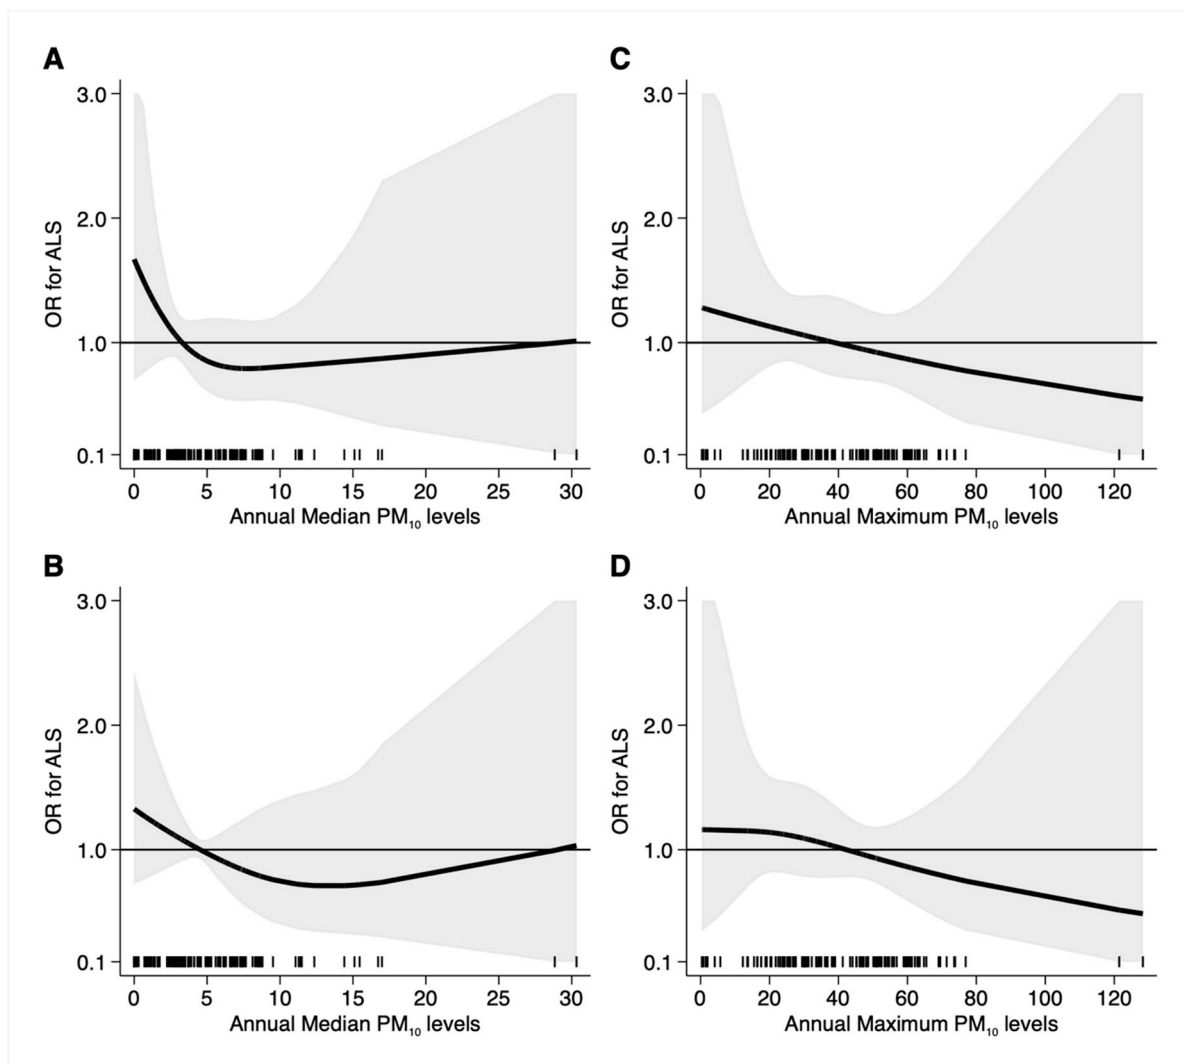

**Figure S1.** Spline regression analysis of amyotrophic lateral sclerosis (ALS) risk for increasing particulate matter (PM<sub>10</sub>) exposure for both annual median and maximum levels using 10<sup>th</sup>, 50<sup>th</sup>, and 90<sup>th</sup> percentile distribution (A, C) or fixed categories (B: 5, 10, and 20 µg/m<sup>3</sup>; D: 10, 20, and 50 µg/m<sup>3</sup>) as cutpoints with further adjustment for agricultural land use. The black line indicates the odds ratio for ALS risk; the dash gray area indicates 95% confidence limits; the reference line is at 1.0; black spikes indicate the distribution of participant PM<sub>10</sub> levels.

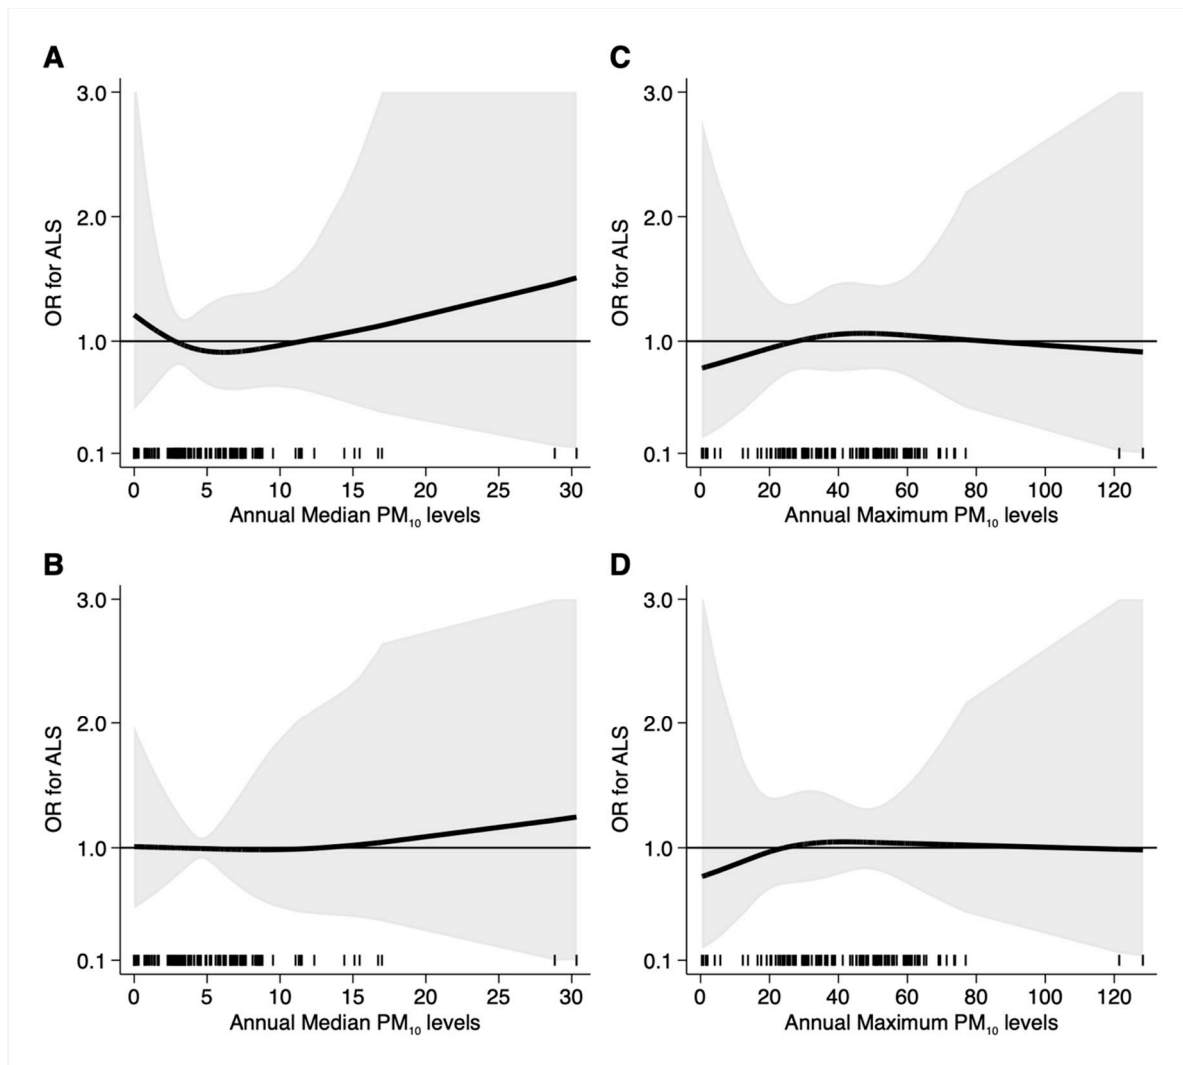

**Figure S2.** Spline regression analysis of amyotrophic lateral sclerosis (ALS) risk for increasing particulate matter (PM<sub>10</sub>) exposure for both annual median and maximum levels using 10<sup>th</sup>, 50<sup>th</sup>, and 90<sup>th</sup> percentile distribution (A, C) or fixed categories (B: 5, 10, and 20 µg/m<sup>3</sup>; D: 10, 20, and 50 µg/m<sup>3</sup>) as cutpoints with further adjustment for agricultural land use. The black line indicates the odds ratio for ALS risk; the dash gray area indicates 95% confidence limits; the reference line is at 1.0; black spikes indicate the distribution of participant PM<sub>10</sub> levels.

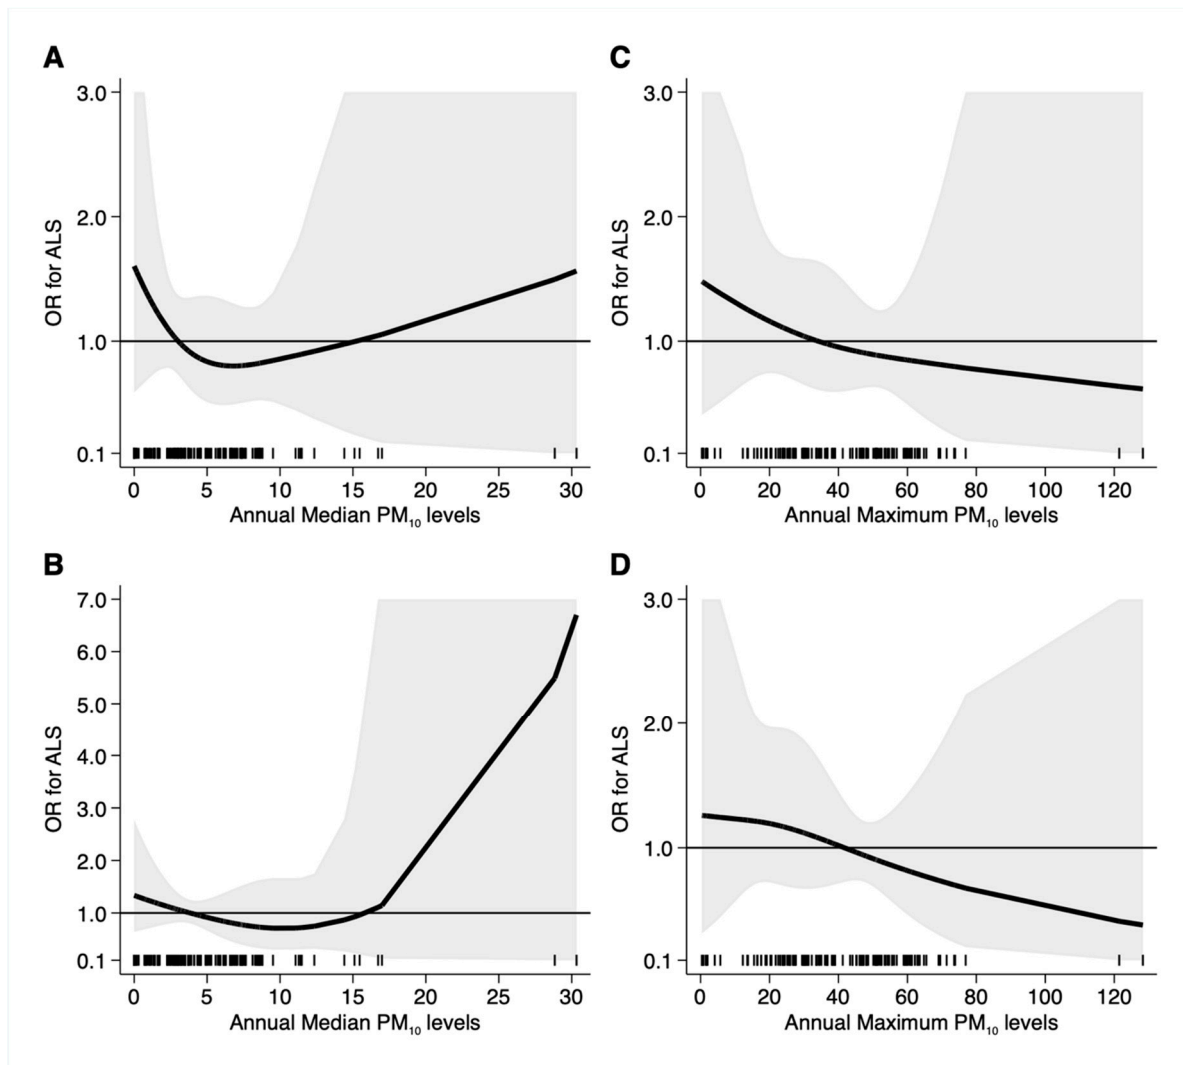

**Figure S3.** Spline regression analysis of amyotrophic lateral sclerosis (ALS) risk for increasing particulate matter (PM<sub>10</sub>) exposure for both annual median and maximum levels using 10<sup>th</sup>, 50<sup>th</sup>, and 90<sup>th</sup> percentile distribution (A, C) or fixed categories (B: 5, 10, and 20 µg/m<sup>3</sup>; D: 10, 20, and 50 µg/m<sup>3</sup>) as cutpoints with further adjustment for inorganic selenium levels in cerebrospinal fluid. The black line indicates the odds ratio for ALS risk; the dash gray area indicates 95% confidence limits; the reference line is at 1.0; black spikes indicate the distribution of participant PM<sub>10</sub> levels.

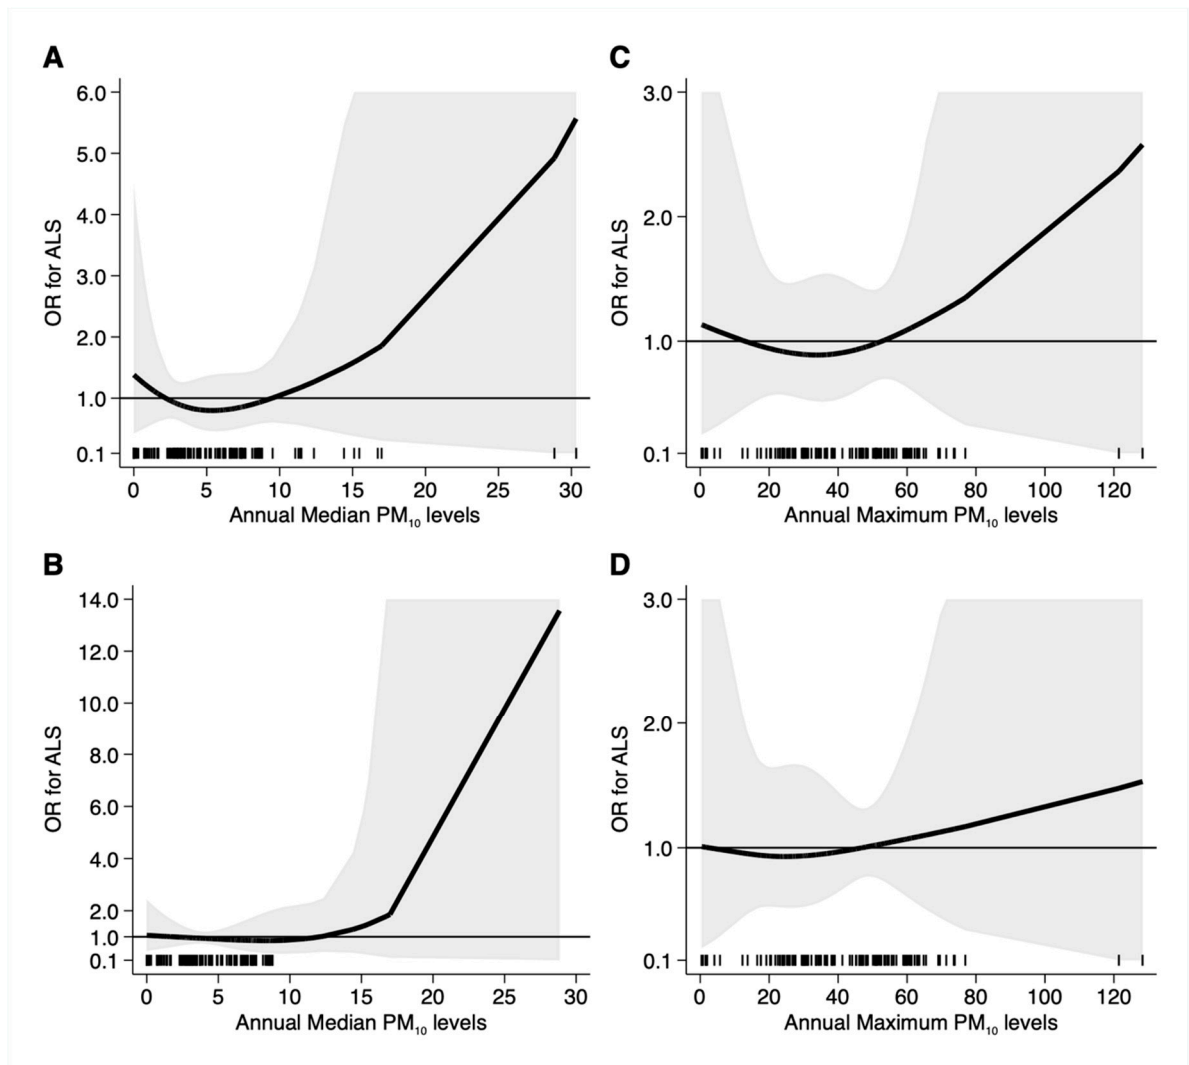

**Figure S4.** Spline regression analysis of amyotrophic lateral sclerosis (ALS) risk for increasing particulate matter (PM<sub>10</sub>) exposure for both annual median and maximum levels using 10<sup>th</sup>, 50<sup>th</sup>, and 90<sup>th</sup> percentile distribution (A, C) or fixed categories (B: 5, 10, and 20 µg/m<sup>3</sup>; D: 10, 20, and 50 µg/m<sup>3</sup>) as cutpoints with further adjustment for inorganic selenium levels in cerebrospinal fluid. The black line indicates the odds ratio for ALS risk; the dash gray area indicates 95% confidence limits; the reference line is at 1.0; black spikes indicate the distribution of participant PM<sub>10</sub> levels.
